# Supplementary material
Source: publisher site journal article supplement (https://www.degruyterbrill.com/publication/journal_key/IRAL/downloadAsset/IRAL_CFP%20Special%20Issue%20on%20Literacy%20teaching%20and%20teacher%20education_CfA.pdf)
Supplement: Supplementary file 1 [file IRAL_CFP%20Special%20Issue%20on%20Literacy%20teaching%20and%20teacher%20education_CfA.pdf]

## **Call for Papers---Special Issue of the International Review of Applied Linguistics in Language Teaching (IRAL)**

**Title:** Literacy Teaching and Teacher Education in English-Medium Education (EME) Contexts

### **Guest Editors:**

- **Dr. Jack Pun**  
Associate Professor, Department of English  
The Chinese University of Hong Kong, Hong Kong SAR, China  
Email: jackpun@cuhk.edu.hk
- **Dr. Rui (Eric) Yuan**  
Associate Professor, Faculty of Education  
University of Macau, Macau SAR, China  
Email: ericruiyuan@um.edu.mo

### **Overview**

This Special Issue invites contributions that explore literacy teaching and teacher education within academic and professional contexts, with a particular focus on English Medium Education (EME) settings, such as schools, universities, and vocational training institutions. The aim is to examine how literacy instruction and teacher preparation can be advanced to meet the evolving demands of multilingual, digital, and interdisciplinary learning and work environments. Contributions should explore the integration of digital tools, emerging technologies, and disciplinary literacy practices, as well as the development of effective teacher education frameworks.

### **Themes of Interest**

We invite papers addressing (but not limited to) the following themes:

1. **Literacy Instruction in EME and Multilingual Settings**  
Strategies to enhance reading, writing, and critical literacy in diverse academic and professional environments.
2. **Critical Digital Literacy for Professional Purposes**  
Integration of GenAI, multimodal platforms, and digital tools to develop workplace-ready communication skills.
3. **Curriculum Design and Reform for Literacy Development**  
Case studies on curricular innovations that support academic and professional literacy in EME contexts.
4. **Cross-Disciplinary Approaches to Literacy and Communication**  
Research on literacy practices bridging academic disciplines and professional domains.
5. **Literacy Teacher Education Practices and Programmes**  
Innovations in preparing teachers to address the demands of teaching literacy in culturally and linguistically diverse classrooms.

## Methodological Approaches

We welcome submissions using diverse methodologies, including but not limited to:

- Ethnographic research on literacy practices
- Multimodal discourse analysis
- Classroom-based action research and interventions

## Submission Timeline

| Stage                                          | Timeline                   |
|------------------------------------------------|----------------------------|
| Call for abstracts and expressions of interest | June – August 2025         |
| Abstract review and selection                  | September – October 2025   |
| Invitation to submit full papers               | November 2025              |
| Full paper preparation by authors              | December 2025 – April 2026 |
| Full paper submission deadline                 | End of April 2026          |
| Peer review and feedback                       | May – August 2026          |
| Revision and resubmission                      | September – December 2026  |
| Final editorial review and production          | January – April 2027       |
| Expected publication                           | Late 2027                  |

## Submission Guidelines

Please send an abstract of **300–500 words** (excluding references) along with a short bio of each author to both guest editors:

- **Dr. Jack Pun:** jackpun@cuhk.edu.hk
- **Dr. Eric Yuan:** ericruiyuan@um.edu.mo

Deadline for abstract submissions: **31 August 2025**

Final manuscripts will go through peer-review through the IRAL submission system once selected.
